# Supplementary material
Source: PubMed Central journal article supplement (PMC6648134)
Supplement: ao9b00521_si_001.pdf [file ao9b00521_si_001.pdf]

# **Oxygen-Vacancy Engineering of Cerium Oxide Nanoparticles for Antioxidant Activity**

*Cindy Gunawan,<sup>\*,1,2</sup> Megan S. Lord,<sup>\*,3</sup> Emma Lovell,<sup>2</sup> Roong Jien Wong,<sup>2,4</sup> Moon Sun Jung,<sup>3</sup> Diana Oscar,<sup>2</sup> Riti Mann,<sup>1</sup> Rose Amal<sup>2</sup>*

***Supporting Information***

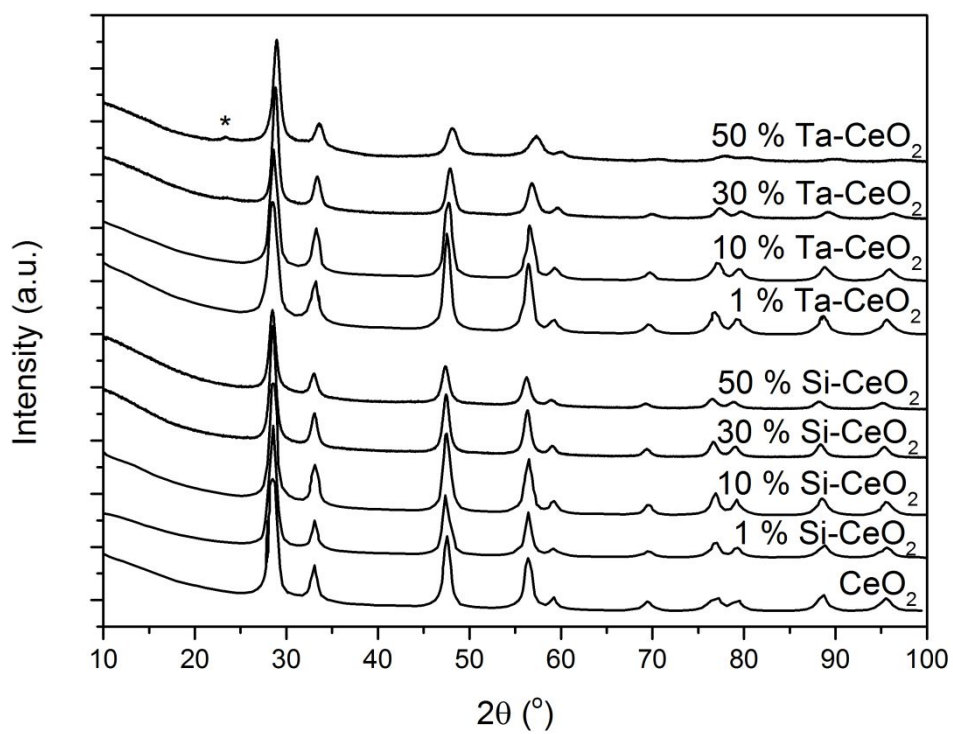

**Figure S1.** XRD spectra of FSP-synthesized nanoceria with 10, 30 and 50 at% Si and Ta doping.

(\*) denotes the presence of  $\text{Ta}_2\text{O}_5$ .

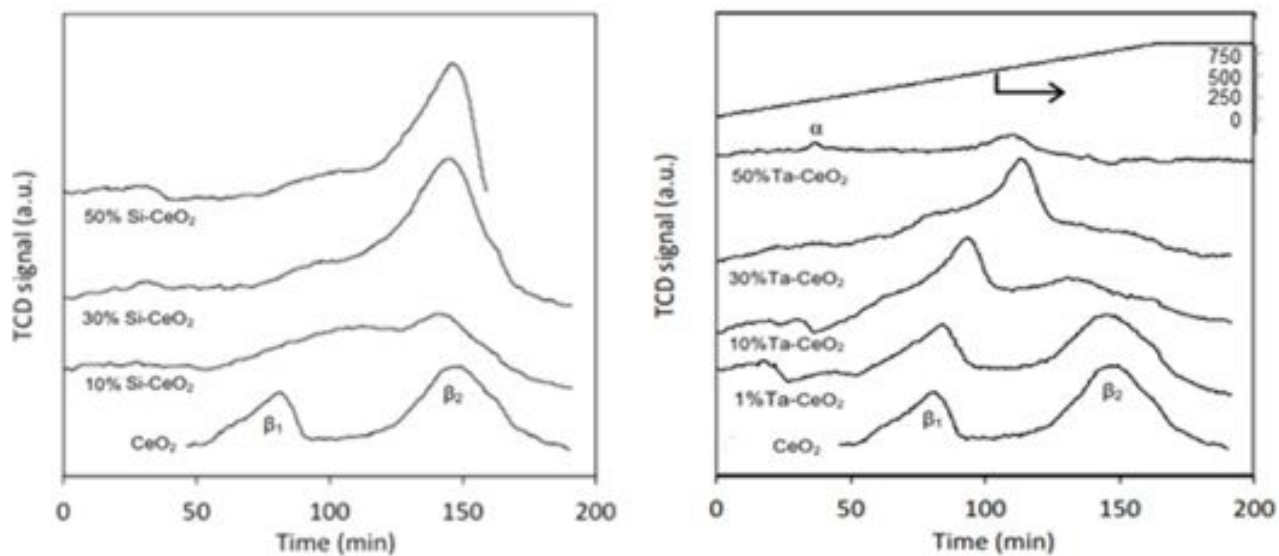

**Figure S2.** H<sub>2</sub>-TPR results of FSP-synthesized nanoceria with 10, 30 and 50 at% Si and Ta doping (top line shows the temperature ramp profile at 10°C/min followed by hold at 850°C). For Si-CeO<sub>2</sub> particles, note the shifting of  $\beta_1$  peak (surface lattice oxygen) towards higher reduction temperature with increasing Si doping, inferring to less accessible oxygen sites. The reduction temperature of  $\beta_2$  peak (bulk lattice oxygen) remains unchanged by the presence of Si doping. For Ta-CeO<sub>2</sub> particles, the merging of  $\beta_1$  and  $\beta_2$  peaks with increasing Ta doping indicates lowering of activation energy for the reduction of lattice oxygen sites on CeO<sub>2</sub>. The emergence of  $\alpha$  peak at 50 at% Ta doping is most likely the characteristic reduction of tantalum oxide clusters.

**Table S1.** Ce<sup>3+</sup>/Ce<sup>4+</sup> surface composition of nanoceria and the dopant variants (XPS analysis).

|                            | Ce <sup>3+</sup> (%) | Ce <sup>4+</sup> (%) | Ce <sup>3+</sup> /Ce <sup>4+</sup><br>surface ratio | % surface Ce <sup>3+</sup> per unit<br>catalyst |
|----------------------------|----------------------|----------------------|-----------------------------------------------------|-------------------------------------------------|
| CeO <sub>2</sub>           | 18.2                 | 81.8                 | 0.22                                                | 18.2                                            |
| 10 at% Si-CeO <sub>2</sub> | 18.2                 | 81.8                 | 0.22                                                | 16.4                                            |
| 50 at% Si-CeO <sub>2</sub> | 24.1                 | 75.9                 | 0.32                                                | 12.0                                            |
| 10 at% Ta-CeO <sub>2</sub> | 18.5                 | 81.5                 | 0.23                                                | 16.7                                            |
| 50 at% Ta-CeO <sub>2</sub> | 27.0                 | 73.0                 | 0.37                                                | 13.5                                            |

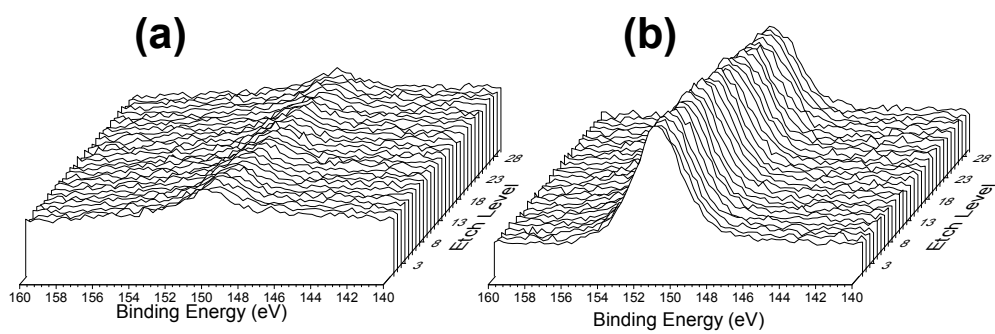

**Figures S3.** Si2p XPS depth spectra of FSP synthesised Si-CeO<sub>2</sub> at (a) 10 and (b) 50 at% Si doping.

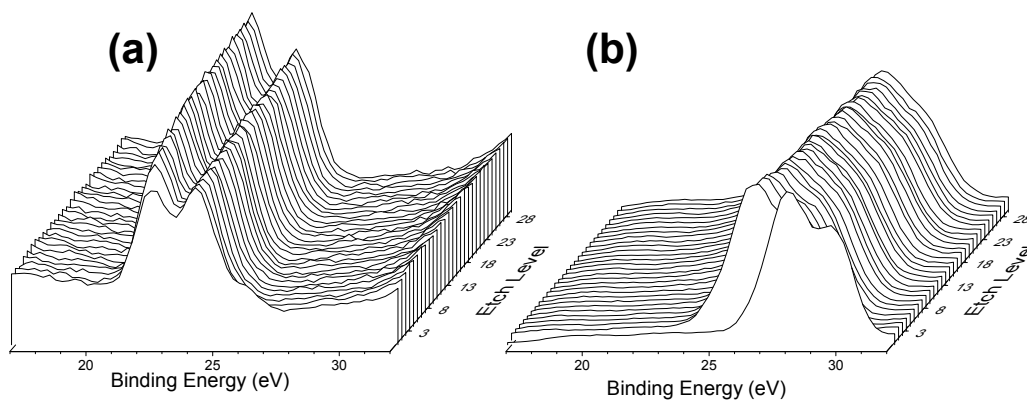

**Figures S4.** Ta4f XPS depth spectra of FSP synthesised Ta-CeO<sub>2</sub> at (a) 10 and (b) 50 at% Ta doping.

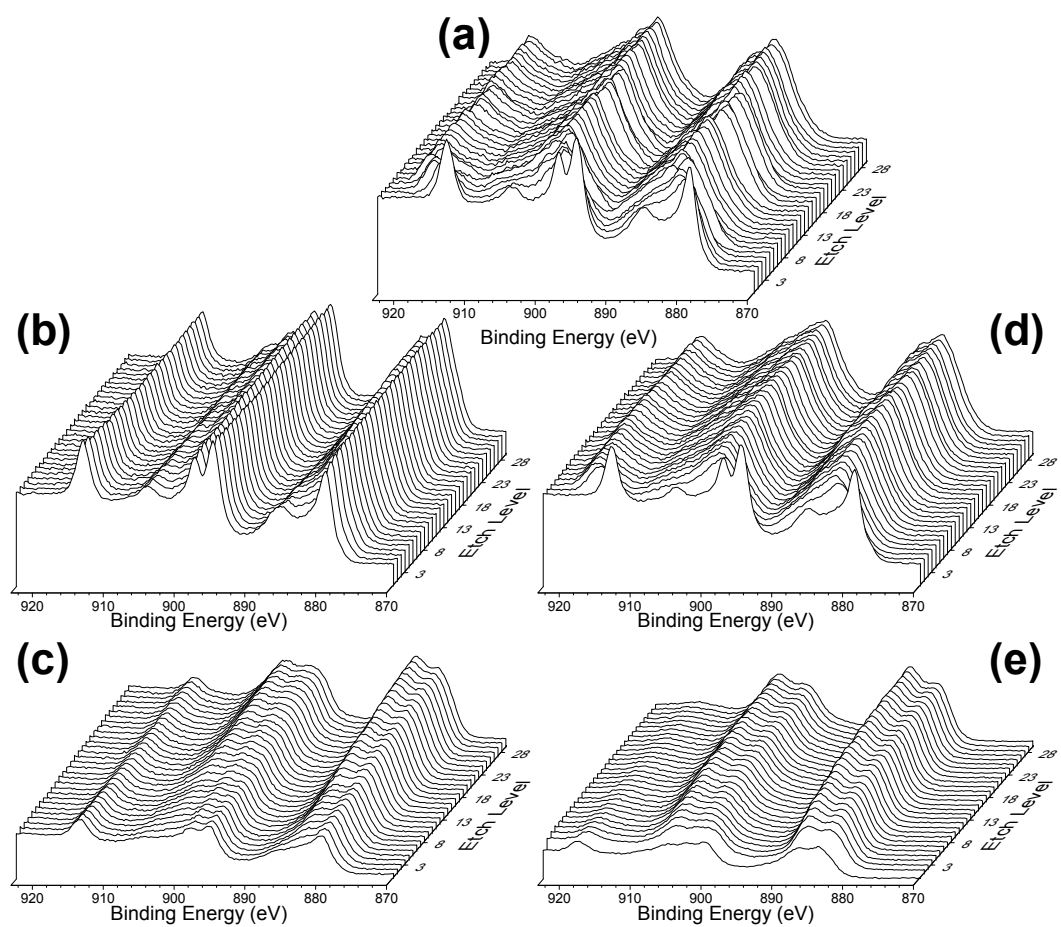

**Figures S5.** Ce3d XPS depth spectra of FSP-synthesized (a) neat nanoceria, (b) 10 and (c) 50 at% Si-CeO<sub>2</sub>, (d) 10 and (e) 50 at% Ta-CeO<sub>2</sub>.

**Table S2.** Aggregate size of nanoceria and the doped variants in the cell culture medium (measured by dynamic light scattering)

|                            | <b>Average hydrodynamic size<br/>(nm ± SEM)<sup>a</sup></b> |
|----------------------------|-------------------------------------------------------------|
| CeO <sub>2</sub>           | 220 ± 6                                                     |
| 10 at% Si-CeO <sub>2</sub> | 163 ± 1                                                     |
| 30 at% Si-CeO <sub>2</sub> | 286 ± 2                                                     |
| 50 at% Si-CeO <sub>2</sub> | 204 ± 12                                                    |
| 10 at% Ta-CeO <sub>2</sub> | 177 ± 16                                                    |
| 30 at% Ta-CeO <sub>2</sub> | 175 ± 6                                                     |
| 50 at% Ta-CeO <sub>2</sub> | 164 ± 3                                                     |

<sup>a</sup>Standard error of mean
